# Supplementary material for: Phenolic Compounds from the Roots of Rhodiola crenulata and Their Antioxidant and Inducing IFN-γ Production Activities
Source: MDPI journal article supplement (doi:10.3390/molecules200813725), 2015-07-28
Supplement: s1 [file s1]

## Supporting Information

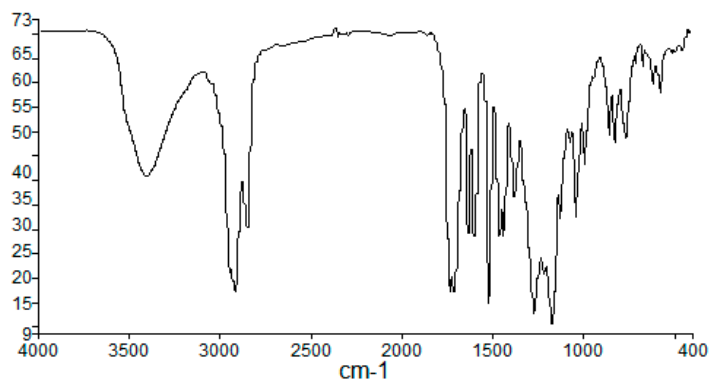

**Figure S1.** IR spectrum of compound **1**.

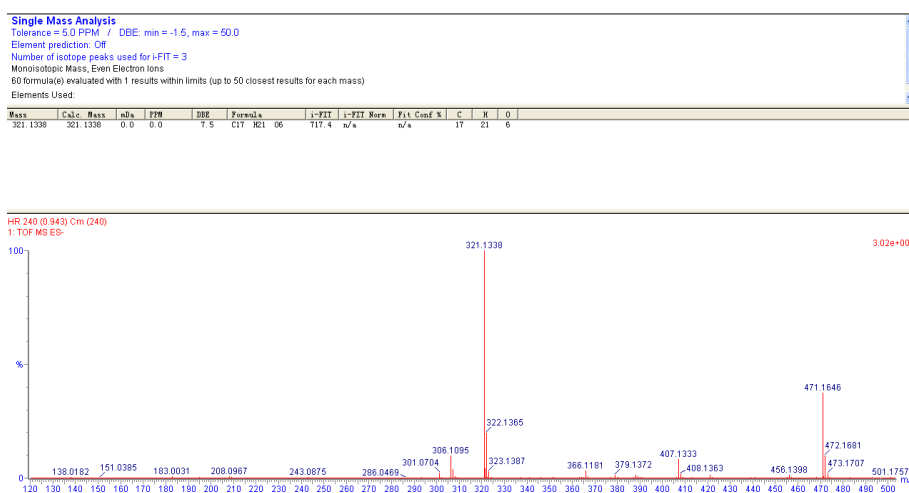

**Figure S2.** HR-ESI-MS of compound **1**.

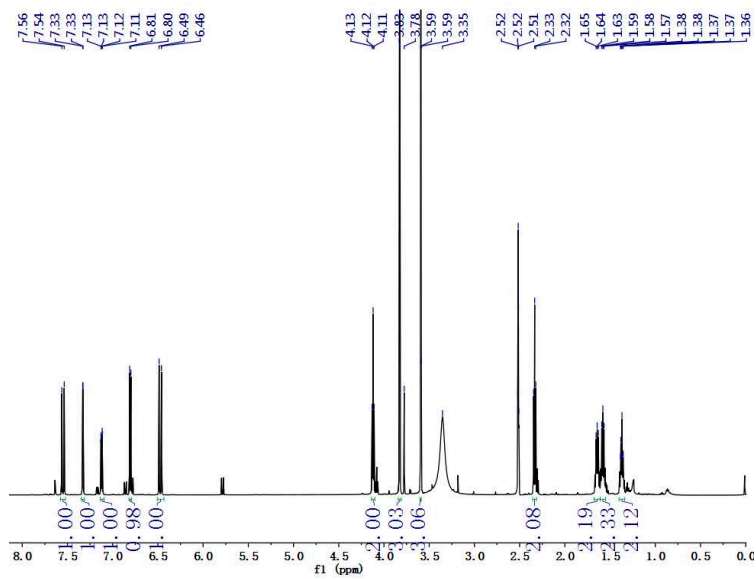

**Figure S3.**  $^1\text{H}$ -NMR spectrum of compound **1**.

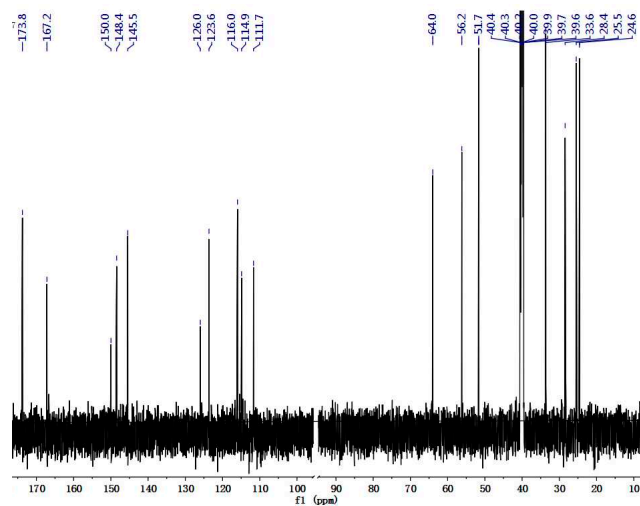

**Figure S4.**  $^{13}\text{C}$ -NMR spectrum of compound **1**.

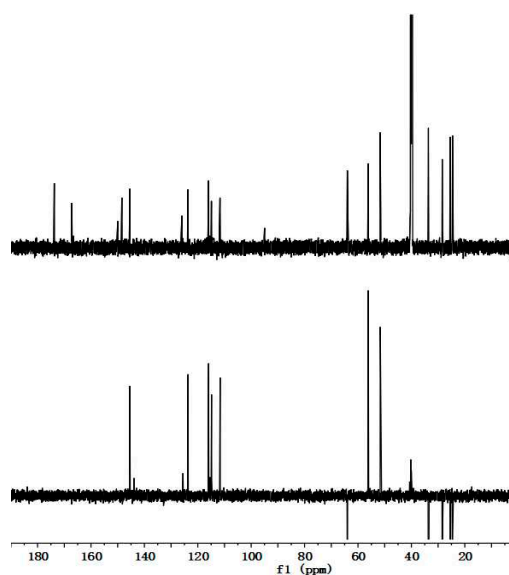

**Figure S5.** DEPT-135 spectrum of compound **1**.

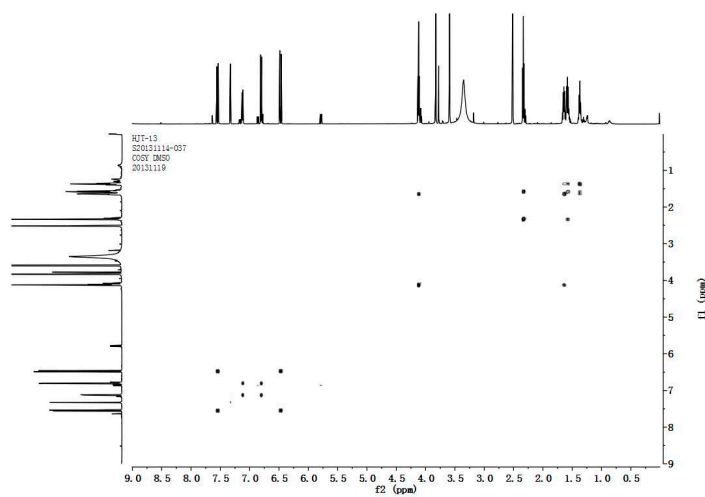

**Figure S6.**  $^1\text{H}$ - $^1\text{H}$  COSY spectrum of compound **1**.

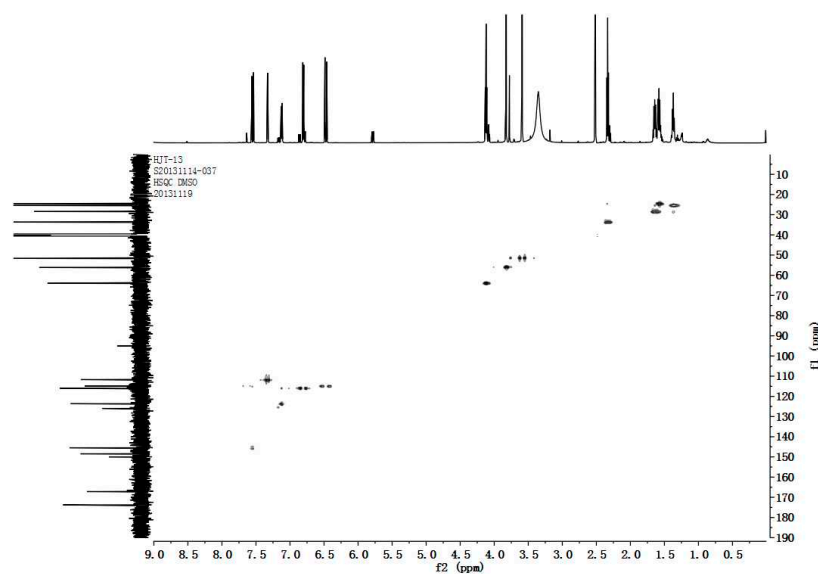

Figure S7. HSQC spectrum of compound 1.

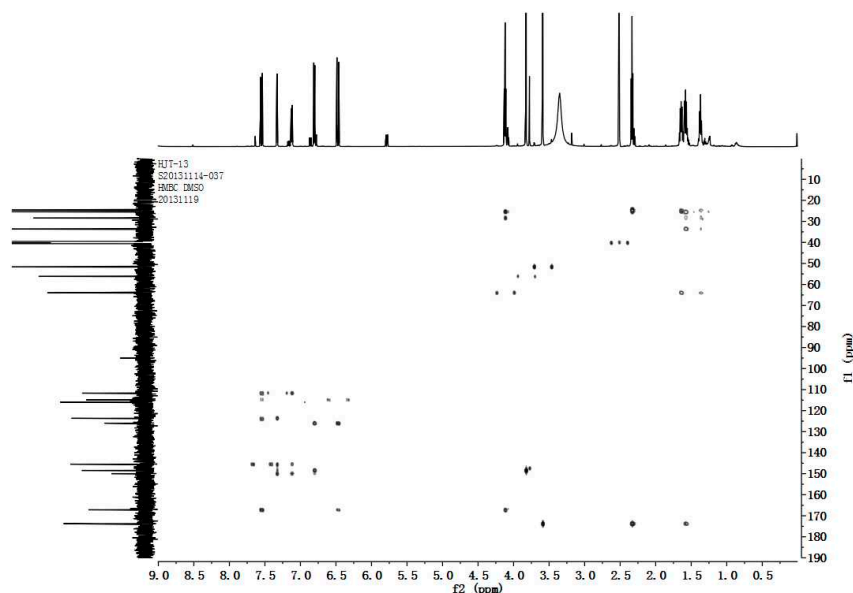

Figure S8. HMBC spectrum of compound 1.

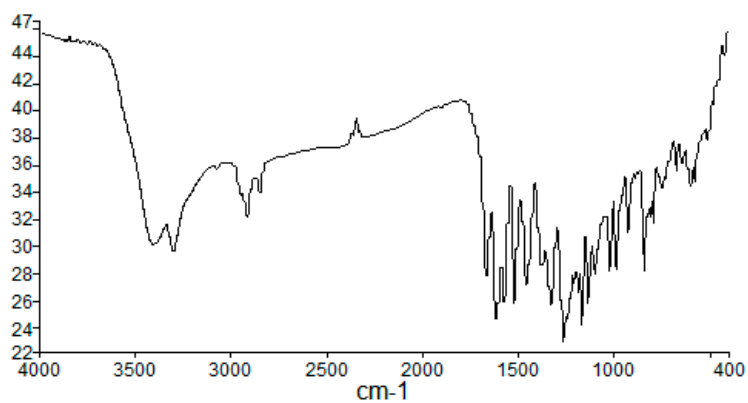

Figure S9. IR spectrum of compound 2.

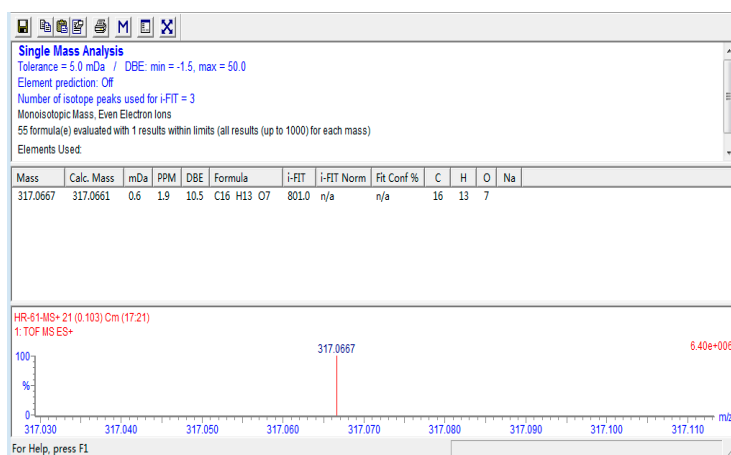

**Figure S10.** HR-ESI-MS of compound **2**.

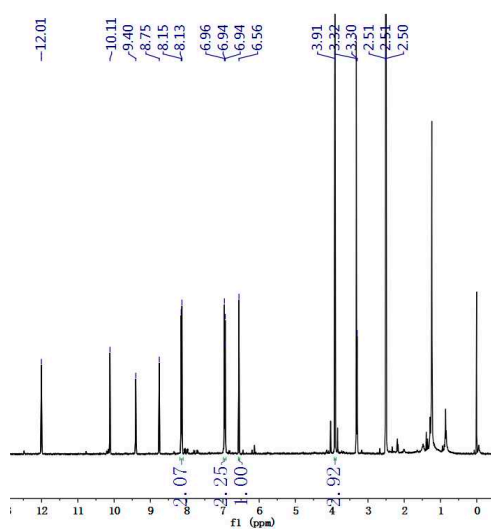

**Figure S11.** <sup>1</sup>H-NMR spectrum of compound **2**.

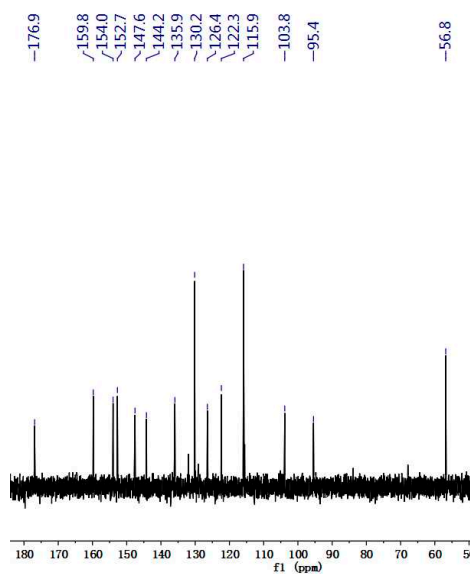

**Figure S12.** <sup>13</sup>C-NMR spectrum of compound **2**.

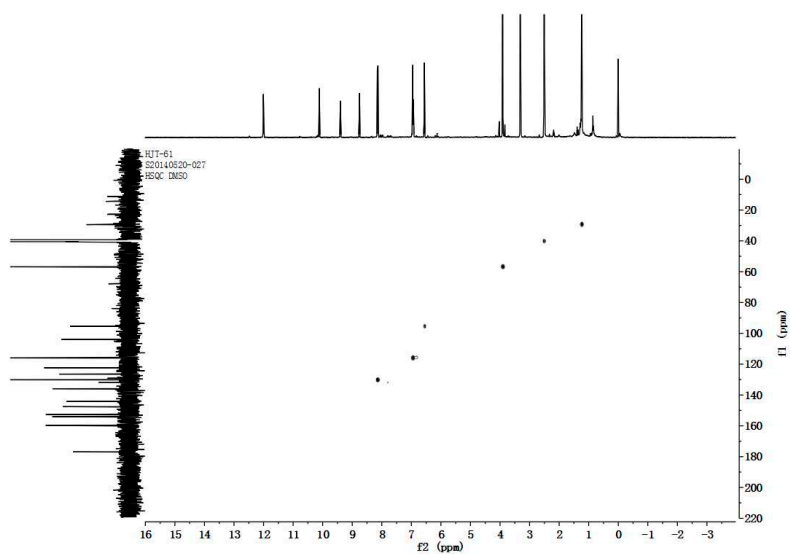

**Figure S13.** HSQC spectrum of compound **2**.

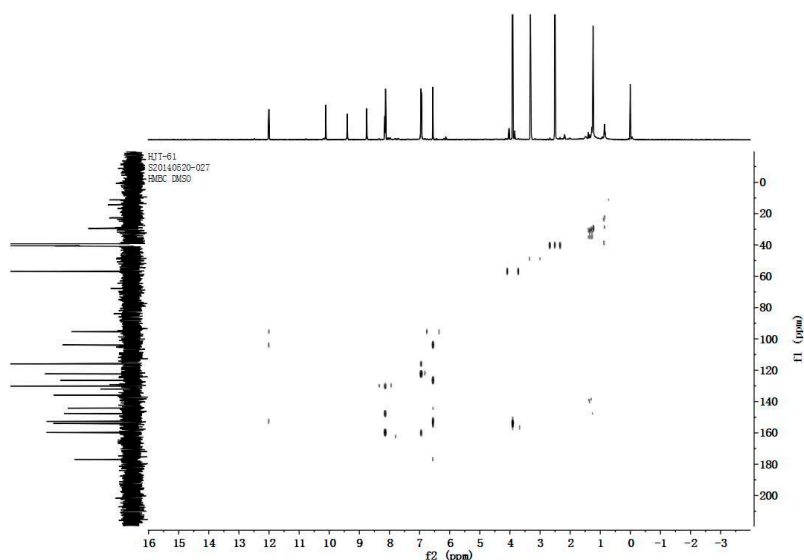

**Figure S14.** HMBC spectrum of compound **2**.

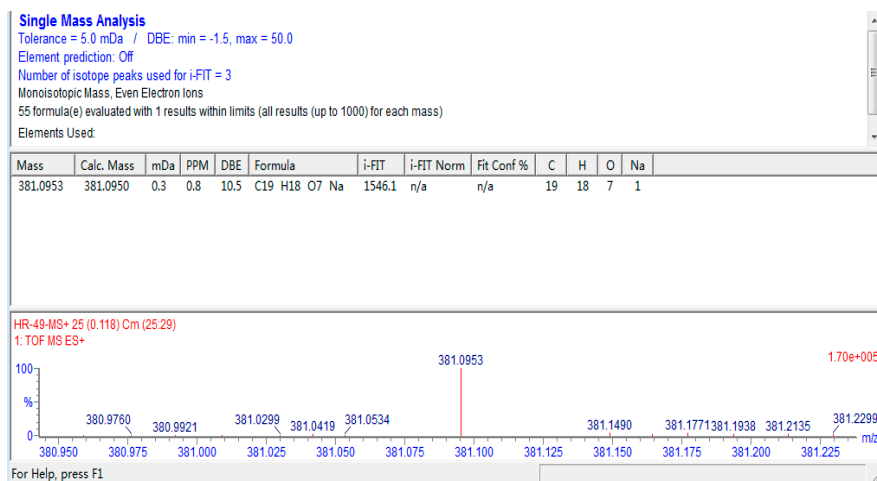

**Figure S15.** HR-ESI-MS of compound **11**.

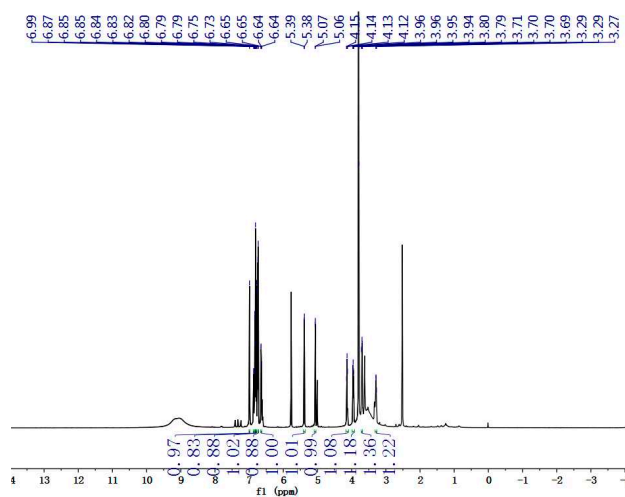

**Figure S16.**  $^1\text{H}$ -NMR spectrum of compound 11.

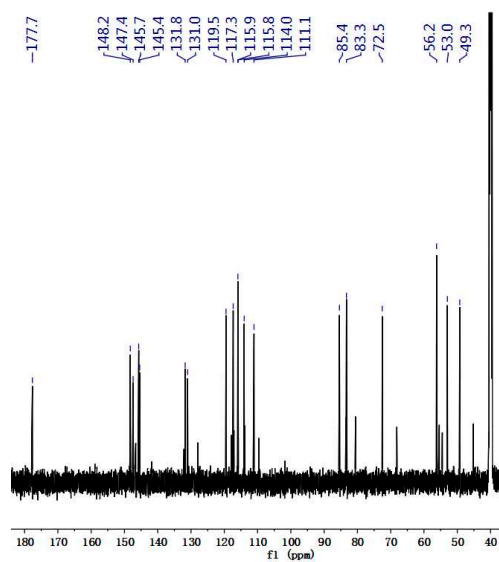

**Figure S17.**  $^{13}\text{C}$ -NMR spectrum of compound 11.

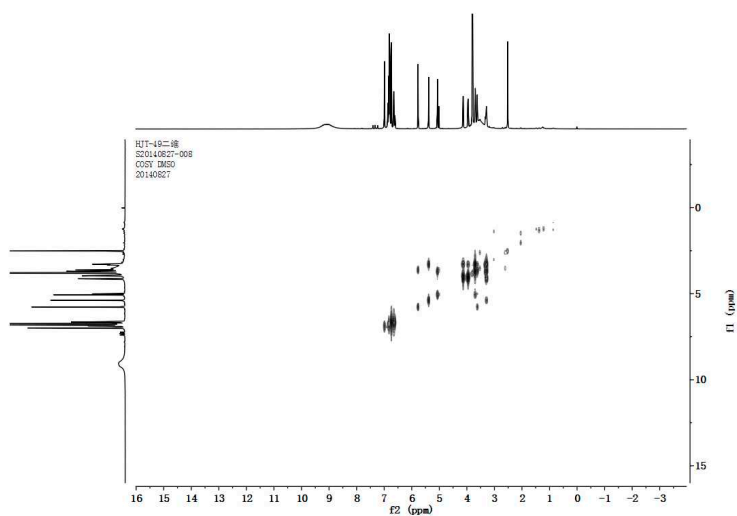

**Figure S18.**  $^1\text{H}$ - $^1\text{H}$  COSY spectrum of compound 11.

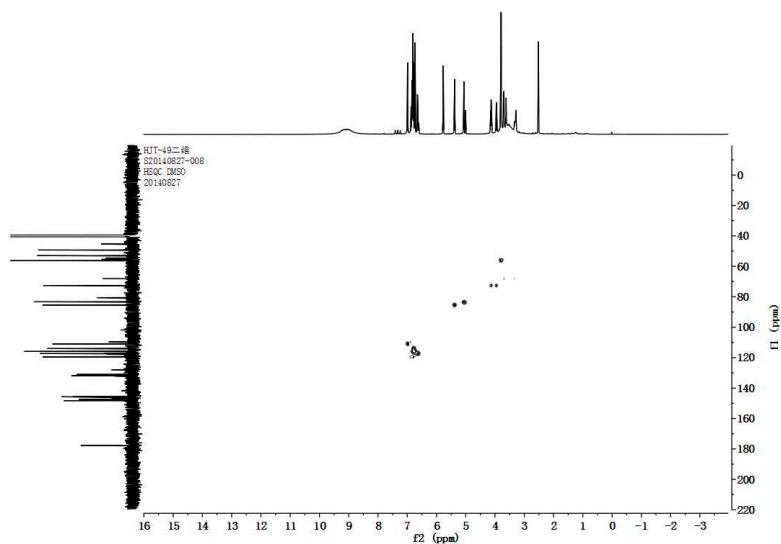

Figure S19. HSQC spectrum of compound 11.

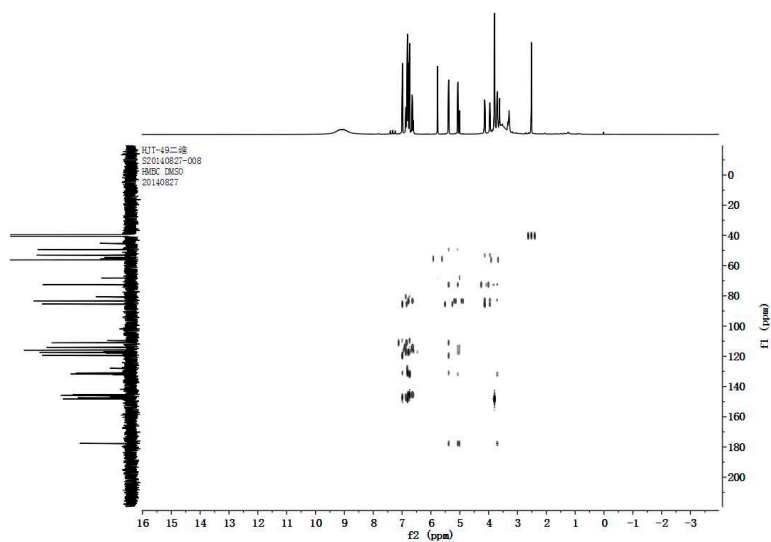

Figure S20. HMBC spectrum of compound 11.

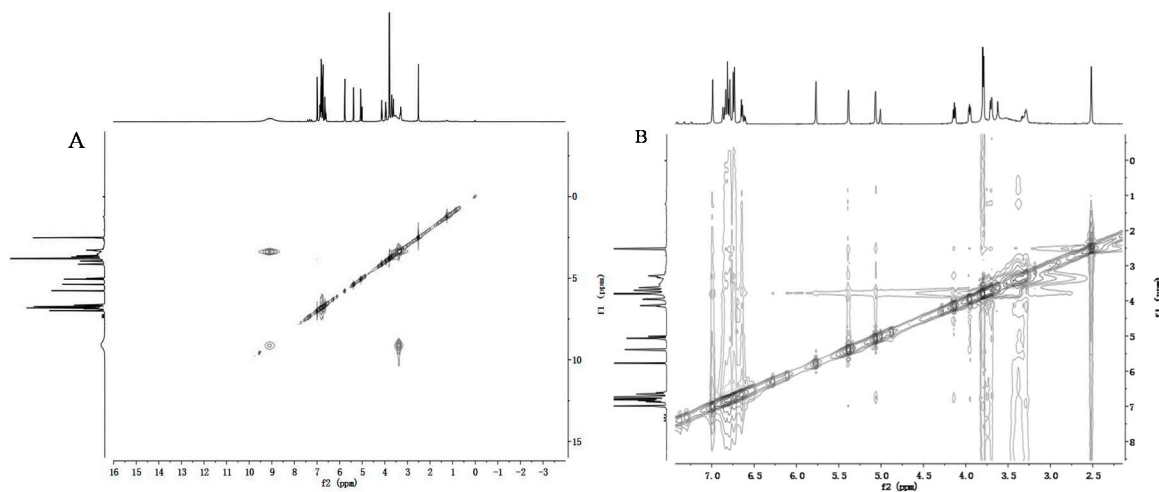

Figure S21. (A)(B) NOESY spectra of compound 11.

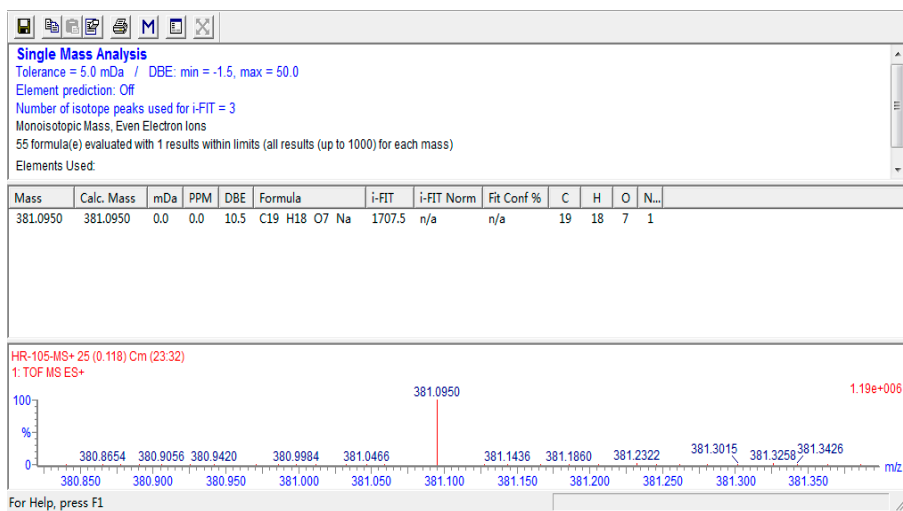

**Figure S22.** HR-ESI-MS of compound **12**.

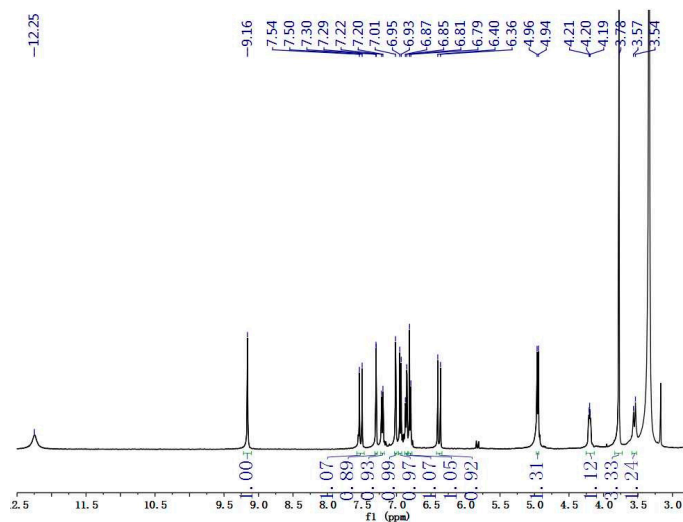

**Figure S23.** <sup>1</sup>H-NMR spectrum of compound **12**.

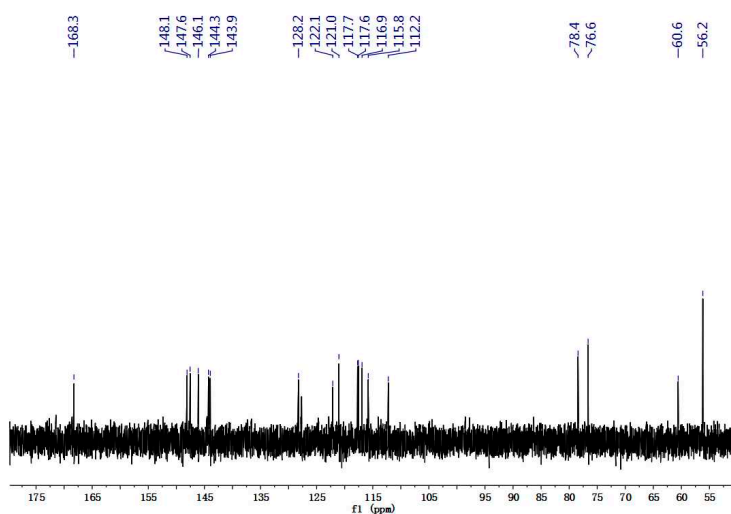

**Figure S24.** <sup>13</sup>C-NMR spectrum of compound **12**.



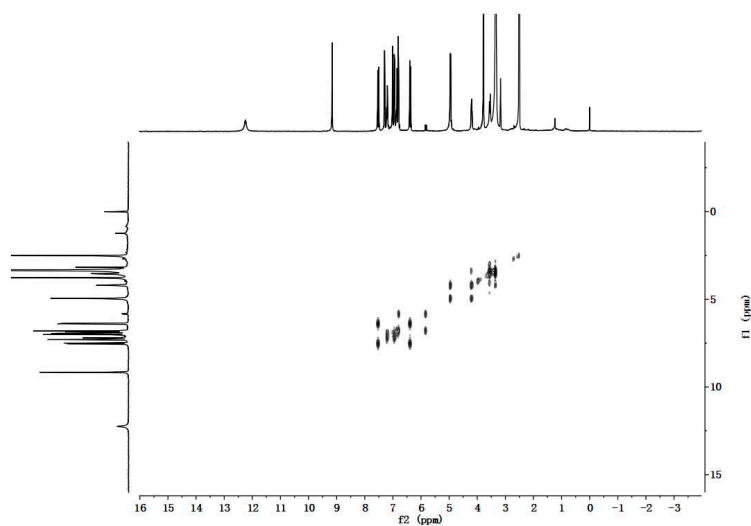

**Figure S25.**  $^1\text{H}$ - $^1\text{H}$  COSY spectrum of compound **12**.

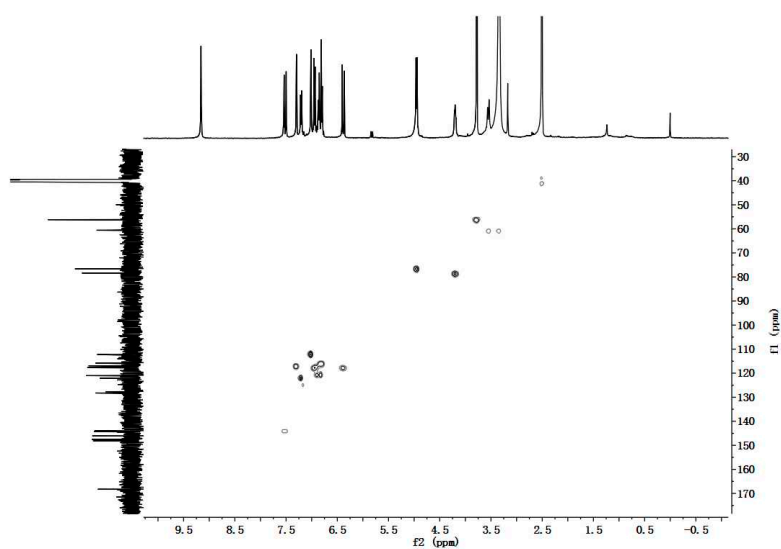

**Figure S26.** HSQC spectrum of compound **12**.

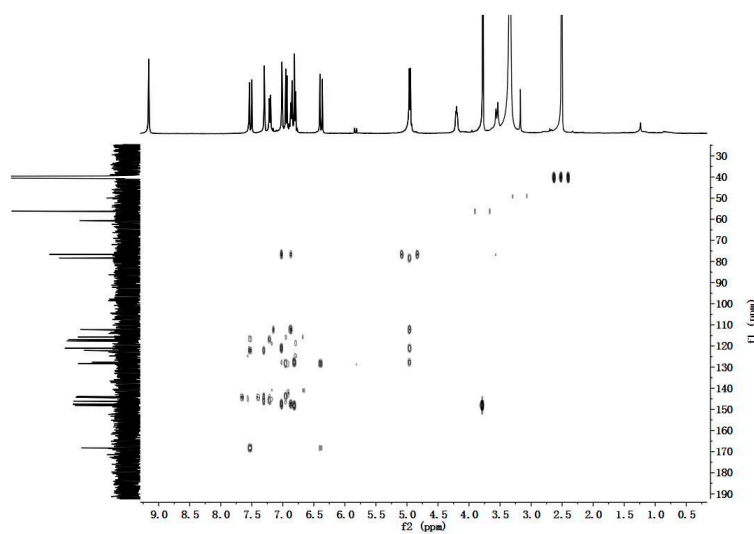

**Figure S27.** HMBC spectrum of compound **12**.

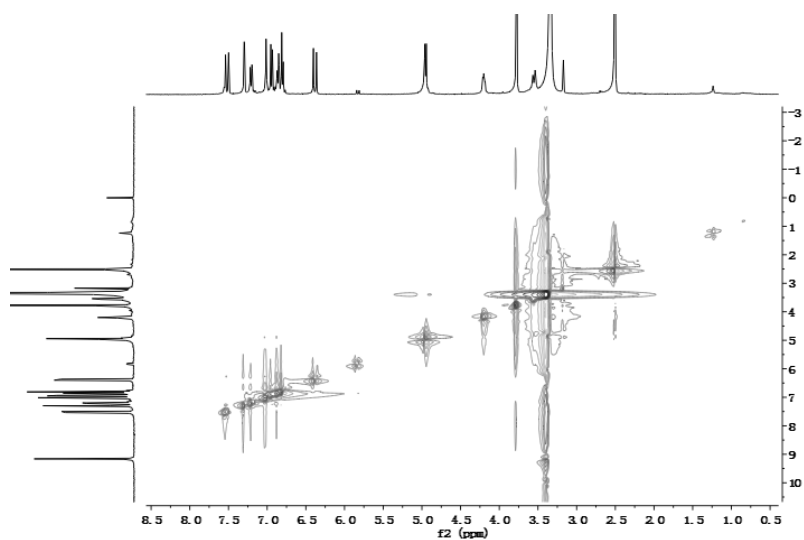

**Figure S28.** NOESY spectrum of compound **12**.

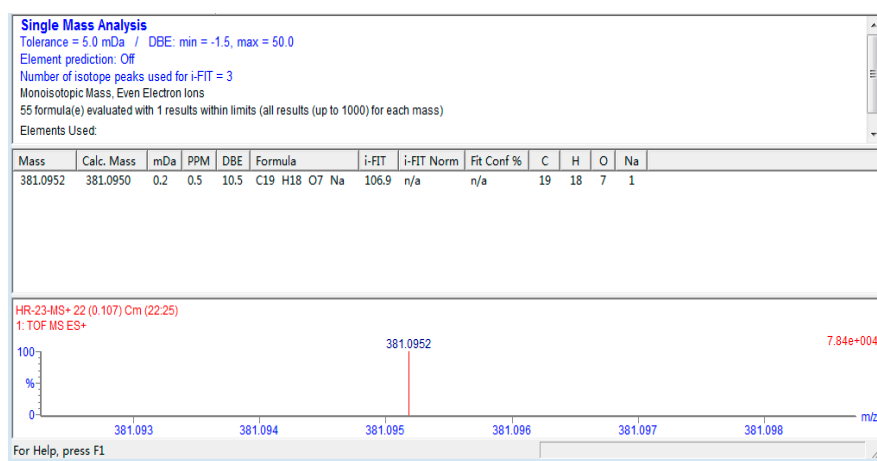

**Figure S29.** HR-ESI-MS of compound **13**.

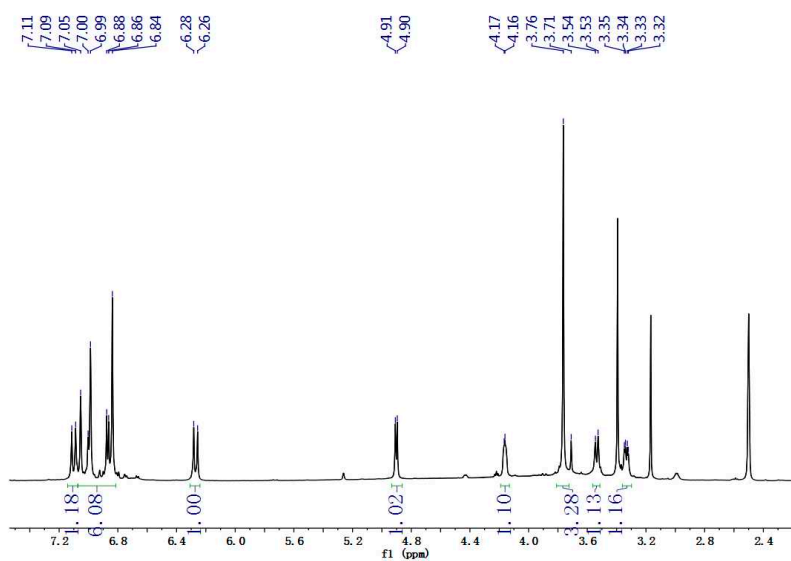

**Figure S30.**  $^1\text{H}$ -NMR spectrum of compound **13**.

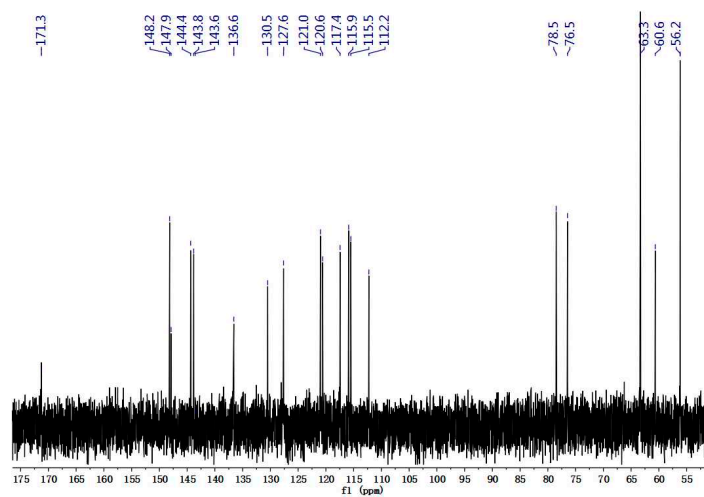

**Figure S31.**  $^{13}\text{C}$ -NMR spectrum of compound **13**.

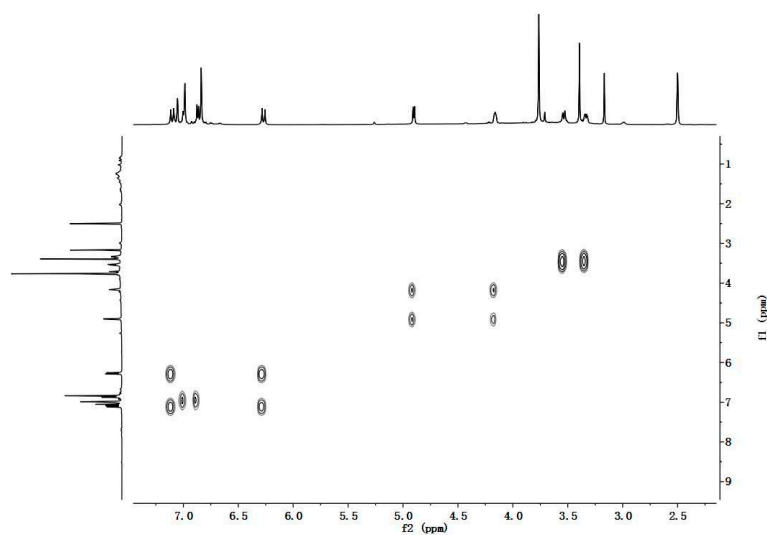

**Figure S32.**  $^1\text{H}$ - $^1\text{H}$  COSY spectrum of compound **13**.

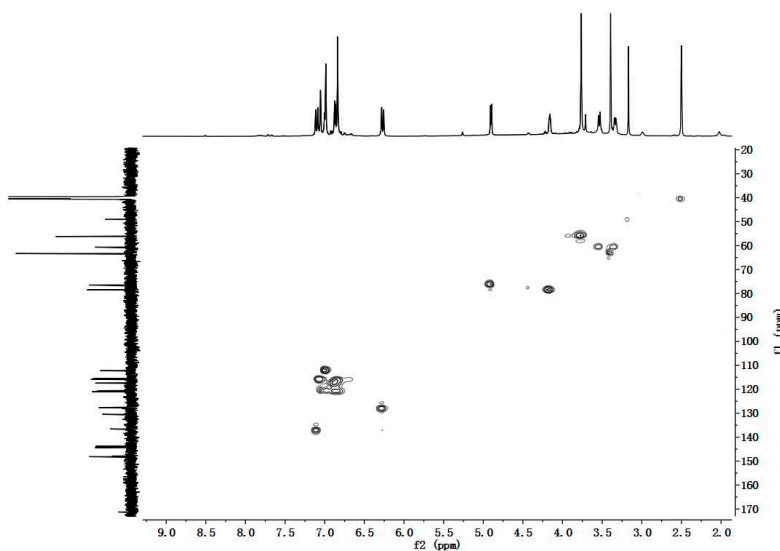

**Figure S33.** HSQC spectrum of compound **13**.

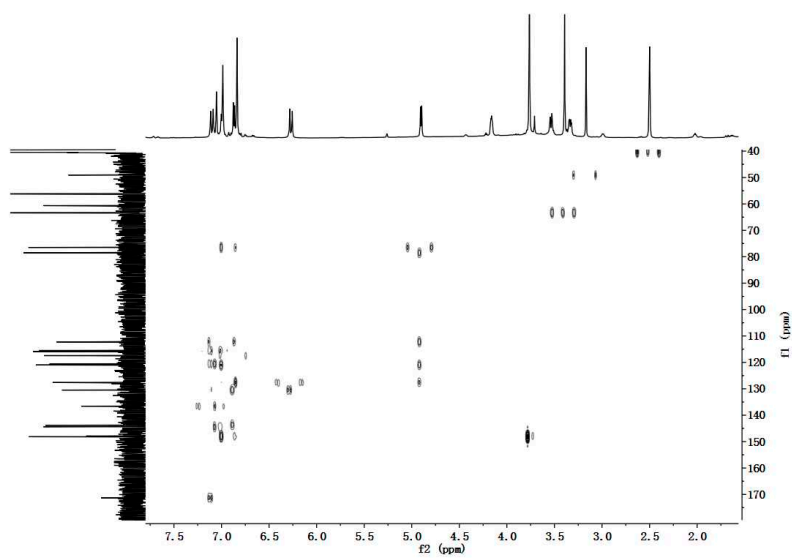

**Figure S34.** HMBC spectrum of compound **13**.

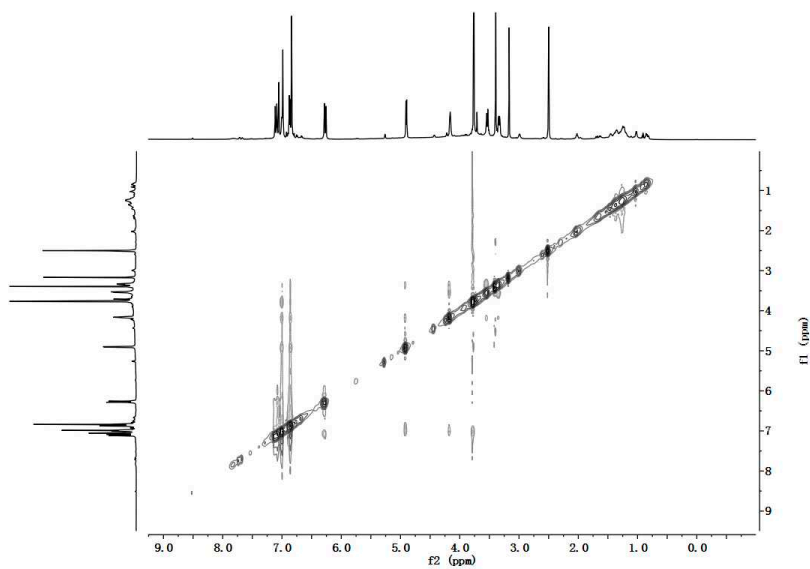

**Figure S35.** ROESY spectrum of compound **13**.
